# Supplementary material for: Saliva microbiome in relation to SARS-CoV-2 infection in a prospective cohort of healthy US adults
Source: PubMed Central journal article supplement (PMC10382861; doi:10.1016/j.ebiom.2023.104731), 2023-07-22
Supplement: mmc1.pdf [file mmc1.pdf]

**Table S1. Clinical summary for the 138 subjects with 16S rRNA gene sequencing of saliva samples**

|                                 | Full Cohort† |            | During After (DA) cohort |            | Before During After (BDA) cohort |            |
|---------------------------------|--------------|------------|--------------------------|------------|----------------------------------|------------|
|                                 | Unexposed    | Exposed    | Unexposed*               | Exposed    | Unexposed*                       | Exposed    |
| <b>Subjects</b>                 | 57           | 81         | 41                       | 47         | 31                               | 34         |
| <b>Total samples</b>            | 313          | 435        | 224                      | 256        | 176                              | 179        |
| <b>Sex: females</b>             | 41 (71.9)    | 60 (74.1)  | 29 (70.7)                | 34 (72.3)  | 24 (77.4)                        | 26 (76.5)  |
| <b>Age</b>                      |              |            |                          |            |                                  |            |
| <b>20-39</b>                    | 31 (54.4)    | 45 (55.6)  | 23 (56.1)                | 28 (59.6)  | 16 (51.6)                        | 17 (50)    |
| <b>40-59</b>                    | 18 (31.6)    | 25 (30.9)  | 13 (31.7)                | 12 (25.5)  | 10 (32.3)                        | 13 (38.2)  |
| <b>over 60</b>                  | 7 (12.3)     | 11 (13.6)  | 5 (12.2)                 | 7 (14.9)   | 4 (12.9)                         | 4 (11.8)   |
| <b>Race</b>                     |              |            |                          |            |                                  |            |
| <b>White</b>                    | 27 (47.4)    | 44 (54.3)  | 17 (41.5)                | 23 (48.9)  | 18 (58.1)                        | 21 (61.8)  |
| <b>Asian</b>                    | 9 (15.8)     | 10 (12.3)  | 7 (17.1)                 | 6 (12.8)   | 5 (16.1)                         | 4 (11.8)   |
| <b>Black</b>                    | 9 (15.8)     | 13 (16)    | 8 (19.5)                 | 9 (19.1)   | 4 (12.9)                         | 4 (11.8)   |
| <b>other</b>                    | 9 (15.8)     | 12 (14.8)  | 7 (17.1)                 | 8 (17)     | 3 (9.7)                          | 4 (11.8)   |
| <b>Ethnicity: Hispanic</b>      | 11 (19.3)    | 17 (21)    | 11 (26.8)                | 14 (29.8)  | 3 (9.7)                          | 3 (8.8)    |
| <b>Smoking</b>                  |              |            |                          |            |                                  |            |
| <b>Never</b>                    | 39 (68.4)    | 51 (63)    | 30 (73.2)                | 29 (61.7)  | 20 (64.5)                        | 22 (64.7)  |
| <b>Past</b>                     | 14 (24.6)    | 27 (33.3)  | 9 (22)                   | 15 (31.9)  | 9 (29)                           | 12 (35.3)  |
| <b>Current</b>                  | 3 (5.3)      | 3 (3.7)    | 2 (4.9)                  | 3 (6.4)    | 1 (3.2)                          | 0 (0)      |
| <b>Comobidities</b>             |              |            |                          |            |                                  |            |
| <b>Any</b>                      | 30 (52.6)    | 43 (53.1)  | 23 (56.1)                | 26 (55.3)  | 16 (51.6)                        | 17 (50)    |
| <b>Diabetes</b>                 | 5 (8.8)      | 2 (2.5)    | 5 (12.2)                 | 2 (4.3)    | 0 (0)                            | 0 (0)      |
| <b>Hypertension</b>             | 9 (15.8)     | 17 (21)    | 6 (14.6)                 | 10 (21.3)  | 3 (9.7)                          | 7 (20.6)   |
| <b>Cardiovascular disease</b>   | 1 (1.8)      | 3 (3.7)    | 1 (2.4)                  | 3 (6.4)    | 0 (0)                            | 0 (0)      |
| <b>Asthma</b>                   | 9 (15.8)     | 10 (12.3)  | 6 (14.6)                 | 6 (12.8)   | 6 (19.4)                         | 4 (11.8)   |
| <b>Autoimmune disease</b>       | 4 (7)        | 4 (4.9)    | 2 (4.9)                  | 1 (2.1)    | 3 (9.7)                          | 3 (8.8)    |
| <b>Symptoms</b>                 |              |            |                          |            |                                  |            |
| <b>Asymptomatic</b>             |              | 9 (11.1)   |                          | 7 (14.9)   |                                  | 2 (5.9)    |
| <b>Mild</b>                     |              | 26 (32.1)  |                          | 18 (38.3)  |                                  | 8 (23.5)   |
| <b>Moderate</b>                 |              | 23 (28.4)  |                          | 10 (21.3)  |                                  | 13 (38.2)  |
| <b>Severe</b>                   |              | 23 (28.4)  |                          | 12 (25.5)  |                                  | 11 (32.4)  |
| <b>Symptom duration</b>         |              |            |                          |            |                                  |            |
| <b>&lt; 10 days</b>             |              | 28 (34.6)  |                          | 19 (40.4)  |                                  | 9 (26.5)   |
| <b>10-29 days</b>               |              | 25 (30.9)  |                          | 11 (23.4)  |                                  | 14 (41.4)  |
| <b>30+ days</b>                 |              | 24 (29.6)  |                          | 14 (29.8)  |                                  | 10 (29.4)  |
| <b>missing</b>                  |              | 4 (4.9)    |                          | 3 (6.4)    |                                  | 1 (2.9)    |
| <b>Days ill; median +/- IQR</b> |              | 17 +/- 121 |                          | 14 +/- 126 |                                  | 29 +/- 113 |
| <b>Treatments</b>               |              |            |                          |            |                                  |            |
| <b>ER</b>                       |              | 7 (8.6)    |                          | 2 (4.3)    |                                  | 5 (14.7)   |
| <b>Hospital admission</b>       |              | 3 (3.7)    |                          | 1 (2.1)    |                                  | 2 (5.9)    |
| <b>Antibiotics</b>              |              | 5 (6.1)    |                          | 2 (4.3)    |                                  | 3 (8.8)    |
| <b>Corticosteroid</b>           |              | 1 (1.2)    |                          | 1 (2.1)    |                                  | 0 (0)      |
| <b>Anticoagulant</b>            |              | 2 (2.5)    |                          | 1 (2.1)    |                                  | 1 (2.9)    |
| <b>Hydroxychloroquine</b>       |              | 6 (7.4)    |                          | 2 (4.2)    |                                  | 4 (11.8)   |
| <b>Remdesivir</b>               |              | 1 (1.2)    |                          | 0 (0)      |                                  | 1 (2.9)    |

Values reported as n (%) unless otherwise stated

†Includes all samples in the DA and BDA cohorts

\*Subset of unexposed are included in both DA and BDA cohorts based on matching criteria with exposed

**Table S2. Clinical characteristics of 79 SARS-CoV-2 infected subjects, according to symptom severity**

|                               | Aymptomatic/<br>Mild | Moderate      | Severe       | p-value*    |
|-------------------------------|----------------------|---------------|--------------|-------------|
| <b>n</b>                      | 35                   | 22            | 22           |             |
| <b>sex (females)</b>          | 27 (77.1)            | 18 (81.8)     | 14 (63.6)    |             |
| <b>Age</b>                    |                      |               |              | 0.08        |
| <b>20-39</b>                  | 21 (60)              | 15 (68.2)     | 8 (36.4)     |             |
| <b>40-59</b>                  | 8 (22.9)             | 4 (18.2)      | 12 (54.5)    |             |
| <b>60+</b>                    | 6 (17.1)             | 3 (13.6)      | 2 (9.1)      |             |
| <b>Race</b>                   |                      |               |              | 0.43        |
| <b>Asian</b>                  | 6 (17.1)             | 0 (0)         | 3 (13.6)     |             |
| <b>Black</b>                  | 4 (11.4)             | 5 (22.7)      | 3 (13.6)     |             |
| <b>White</b>                  | 20 (57.1)            | 13 (59.1)     | 11 (50)      |             |
| <b>Other</b>                  | 5 (14.3)             | 4 (18.2)      | 3 (13.6)     |             |
| <b>Hispanic</b>               | 5 (14.3)             | 7 (31.8)      | 5 (22.7)     | 0.3         |
| <b>Smoking</b>                |                      |               |              | 0.81        |
| <b>Never</b>                  | 20 (57.1)            | 15 (68.2)     | 15 (68.2)    |             |
| <b>Past</b>                   | 13 (37.1)            | 6 (27.3)      | 7 (31.8)     |             |
| <b>Current</b>                | 2 (5.7)              | 1 (4.5)       | 0 (0)        |             |
| <b>Co-mobidities</b>          |                      |               |              |             |
| <b>Any</b>                    | 19 (54.3)            | 8 (36.4)      | 15 (68.2)    | 0.12        |
| <b>Diabetes</b>               | 2 (5.7)              | 0 (0)         | 0 (0)        | 0.5         |
| <b>Hypertension</b>           | 6 (17.1)             | 4 (18.2)      | 7 (31.8)     | 0.3         |
| <b>Cardiovascular disease</b> | 2 (5.7)              | 1 (4.5)       | 0 (0)        | 0.79        |
| <b>Asthma</b>                 | 5 (14.3)             | 1 (4.5)       | 4 (18.2)     | 0.39        |
| <b>Autoimmune disease</b>     | 2 (5.7)              | 0 (0)         | 2 (9.1)      | 0.38        |
| <b>Antibiotic use</b>         | 0 (0)                | 1 (4.5)       | 4 (18.2)     | <b>0.01</b> |
| <b>Timepoint (day)**</b>      |                      |               |              | 0.76        |
| <b>before</b>                 | 11 (-14 ± 14)        | 12 (-14 ± 14) | 10 (-14 ± 7) |             |
| <b>during</b>                 | 34 (0 ± 0)           | 20 (0 ± 0)    | 17 (0 ± 0)   |             |
| <b>early after</b>            | 34 (14 ± 10.5)       | 22 (28 ± 14)  | 22 (28 ± 14) |             |
| <b>late after</b>             | 11 (140 ± 28)        | 12 (154 ± 14) | 10 (154 ± 7) |             |

values reported as n (%) unless otherwise stated

\*Fisher's exact test

\*\*n = number of subjects (median sample day ± IQR)

**Table S3. Clinical characteristics of 79 SARS-CoV-2 infected subjects, according to illness duration**

|                               | short illness<br>(≤ 30 days) | long illness<br>(> 90 days) | p-value*    |
|-------------------------------|------------------------------|-----------------------------|-------------|
| <b>n</b>                      | 52                           | 27                          |             |
| <b>sex (females)</b>          | 40 (76.9)                    | 19 (70.4)                   | 0.59        |
| <b>Age</b>                    |                              |                             | 0.62        |
| <b>20-39</b>                  | 31 (59.6)                    | 13 (48.1)                   |             |
| <b>40-59</b>                  | 14 (26.9)                    | 10 (37)                     |             |
| <b>60+</b>                    | 7 (13.5)                     | 4 (14.8)                    |             |
| <b>Race</b>                   |                              |                             | 0.63        |
| <b>Asian</b>                  | 6 (11.5)                     | 3 (11.1)                    |             |
| <b>Black</b>                  | 6 (11.5)                     | 6 (22.2)                    |             |
| <b>White</b>                  | 31 (59.6)                    | 13 (48.1)                   |             |
| <b>Other</b>                  | 9 (17.3)                     | 5 (18.5)                    |             |
| <b>Hispanic</b>               | 12 (23.1)                    | 5 (18.5)                    | 0.78        |
| <b>Smoking</b>                |                              |                             | 0.83        |
| <b>Never</b>                  | 34 (65.4)                    | 16 (59.3)                   |             |
| <b>Past</b>                   | 16 (30.8)                    | 10 (37)                     |             |
| <b>Current</b>                | 2 (3.8)                      | 1 (3.7)                     |             |
| <b>Comorbidities</b>          |                              |                             |             |
| <b>Any</b>                    | 23 (44.2)                    | 19 (70.4)                   | 0.34        |
| <b>Diabetes</b>               | 2 (3.8)                      | 0 (0)                       | 0.54        |
| <b>Hypertension</b>           | 9 (17.3)                     | 8 (29.6)                    | 0.14        |
| <b>Cardiovascular disease</b> | 2 (3.8)                      | 1 (3.7)                     | 1           |
| <b>Asthma</b>                 | 5 (9.6)                      | 5 (18.5)                    | 0.3         |
| <b>Autoimmune disease</b>     | 1 (1.9)                      | 3 (11.1)                    | 0.11        |
| <b>Symptoms</b>               |                              |                             | <b>0.03</b> |
| <b>Asymptomatic</b>           | 9 (17.3)                     | 0 (0)                       |             |
| <b>Mild</b>                   | 19 (36.5)                    | 7 (25.9)                    |             |
| <b>Moderate</b>               | 13 (25)                      | 9 (33.3)                    |             |
| <b>Severe</b>                 | 11 (21.2)                    | 11 (40.7)                   |             |
| <b>antibiotic use</b>         | 4 (7.7)                      | 1 (3.7)                     | 0.66        |
| <b>Timepoints**</b>           |                              |                             |             |
| <b>before</b>                 | 19 (-14 ± 14)                | 14 (-14 ± 10.5)             |             |
| <b>during</b>                 | 48 (0 ± 0)                   | 23 (0 ± 0)                  |             |
| <b>early after</b>            | 51 (14 ± 14)                 | 27 (28 ± 21)                |             |
| <b>late after</b>             | 19 (154 ± 14)                | 14 (154 ± 14)               |             |

values reported as n (%) unless otherwise stated

\*Fisher's exact test

\*\*n (median sample day ± IQR)

**Table S4. Clinical summary for the 62 subjects with shotgun metagenomics sequencing of saliva samples**

|                                 | Full Cohort† |            | Before During After (BDA) cohort |                 |
|---------------------------------|--------------|------------|----------------------------------|-----------------|
|                                 | Unexposed    | Exposed    | Unexposed                        | Exposed         |
| <b>Subjects</b>                 | 30           | 32         | 11                               | 6               |
| <b>Total samples</b>            | 64           | 59         | 33                               | 18              |
| <b>Sex: females</b>             | 24 (80)      | 24 (75)    | 8 (72.7)                         | 3 (50)          |
| <b>Age</b>                      |              |            |                                  |                 |
| <b>20-39</b>                    | 15 (50)      | 16 (50)    | 2 (18.2)                         | 3 (50)          |
| <b>40-59</b>                    | 11 (36.7)    | 12 (37.5)  | 6 (54.5)                         | 2 (33.3)        |
| <b>over 60</b>                  | 4 (13.3)     | 4 (12.5)   | 3 (27.3)                         | 1 (16.7)        |
| <b>Race</b>                     |              |            |                                  |                 |
| <b>White</b>                    | 19 (63.3)    | 19 (59.4)  | 8 (72.7)                         | 6 (100)         |
| <b>Asian</b>                    | 4 (13.3)     | 4 (12.5)   | 1 (9.1)                          | 0 (0)           |
| <b>Black</b>                    | 4 (13.3)     | 4 (12.5)   | 0 (0)                            | 0 (0)           |
| <b>other</b>                    | 3 (10)       | 4 (12.5)   | 2 (18.2)                         | 0 (0)           |
| <b>Ethnicity: Hispanic</b>      | 3 (10)       | 3 (9.4)    | 1 (9.1)                          | 0 (0)           |
| <b>Smoking</b>                  |              |            |                                  |                 |
| <b>Never</b>                    | 20 (66.7)    | 20 (62.5)  | 4 (36.4)                         | 4 (66.7)        |
| <b>Past</b>                     | 9 (30)       | 12 (37.5)  | 7 (63.6)                         | 2 (33.3)        |
| <b>Current</b>                  | 1 (3.3)      | 0 (0)      | 0 (0)                            | 0 (0)           |
| <b>Comorbidities</b>            |              |            |                                  |                 |
| <b>Any</b>                      | 17 (56.7)    | 16 (50)    | 8 (72.7)                         | 2 (33.3)        |
| <b>Diabetes</b>                 | 0 (0)        | 0 (0)      | 0 (0)                            | 0 (0)           |
| <b>Hypertension</b>             | 3 (10)       | 7 (21.9)   | 2 (18.2)                         | 2 (33.3)        |
| <b>Cardiovascular disease</b>   | 0 (0)        | 0 (0)      | 0 (0)                            | 0 (0)           |
| <b>Asthma</b>                   | 6 (20)       | 4 (12.5)   | 2 (18.2)                         | 0 (0)           |
| <b>Autoimmune disease</b>       | 3 (10)       | 3 (9.4)    | 2 (18.2)                         | 0 (0)           |
| <b>Symptoms</b>                 |              |            |                                  |                 |
| <b>Asymptomatic</b>             | 0 (0)        | 2 (6.3)    | 0 (0)                            | 0 (0)           |
| <b>Mild</b>                     | 0 (0)        | 8 (25)     | 0 (0)                            | 3 (50)          |
| <b>Moderate</b>                 | 0 (0)        | 11 (34.4)  | 0 (0)                            | 1 (16.7)        |
| <b>Severe</b>                   | 0 (0)        | 11 (34.4)  | 0 (0)                            | 2 (33.3)        |
| <b>Symptom duration</b>         |              |            |                                  |                 |
| <b>&lt; 10 days</b>             |              | 8 (25)     |                                  | 1 (16.7)        |
| <b>10-29 days</b>               |              | 13 (40.6)  |                                  | 2 (33.3)        |
| <b>30+ days</b>                 |              | 10 (31.3)  |                                  | 3 (50)          |
| <b>missing</b>                  |              | 1 (3.1)    |                                  | 0 (0)           |
| <b>Days ill; median +/- IQR</b> |              | 29 +/- 111 |                                  | 79.5 +/- 117.25 |
| <b>Treatments</b>               |              |            |                                  |                 |
| <b>ER</b>                       |              | 5 (15.6)   |                                  | 1 (16.7)        |
| <b>Hospital admission</b>       |              | 2 (6.3)    |                                  | 0 (0)           |
| <b>Antibiotics</b>              |              | 3 (9.4)    |                                  | 0 (0)           |

Values reported as n (%) unless otherwise stated

†Includes all samples in the BDA cohort

**Table S5. Sample breakdown for the 123 samples for which shotgun metagenomics data were obtained**

|                           | <b>Unexposed<br/>n=30</b> | <b>Exposed<br/>n=32</b> | <b>Total<br/>samples</b> |
|---------------------------|---------------------------|-------------------------|--------------------------|
| All 3 time points         | 11                        | 6                       | 51                       |
| 2 time points only        | 12                        | 15                      | 54                       |
| Before & during infection | 8                         | 4                       | 24                       |
| Before & after infection  | 2                         | 8                       | 20                       |
| During & after infection  | 2                         | 3                       | 10                       |
| 1 time point only         | 7                         | 11                      | 18                       |
| Before infection          | 3                         | 6                       | 9                        |
| During infection          | 1                         | 2                       | 3                        |
| After infection           | 3                         | 3                       | 6                        |

**Table S6. Co-occurrence guild membership**

*See separate excel spreadsheet containing the table*

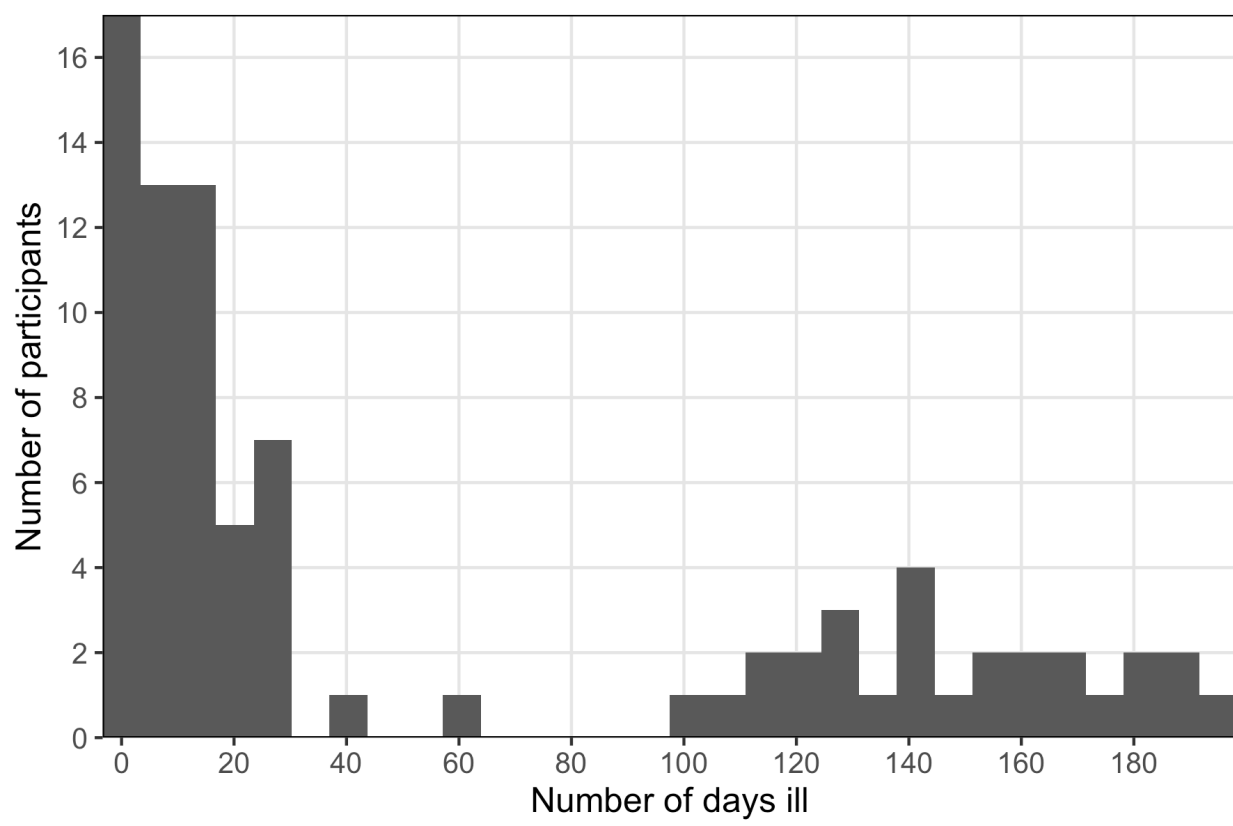

**Figure S1. Histogram of the days ill for the 81 subjects infected with SARS-CoV-2.**

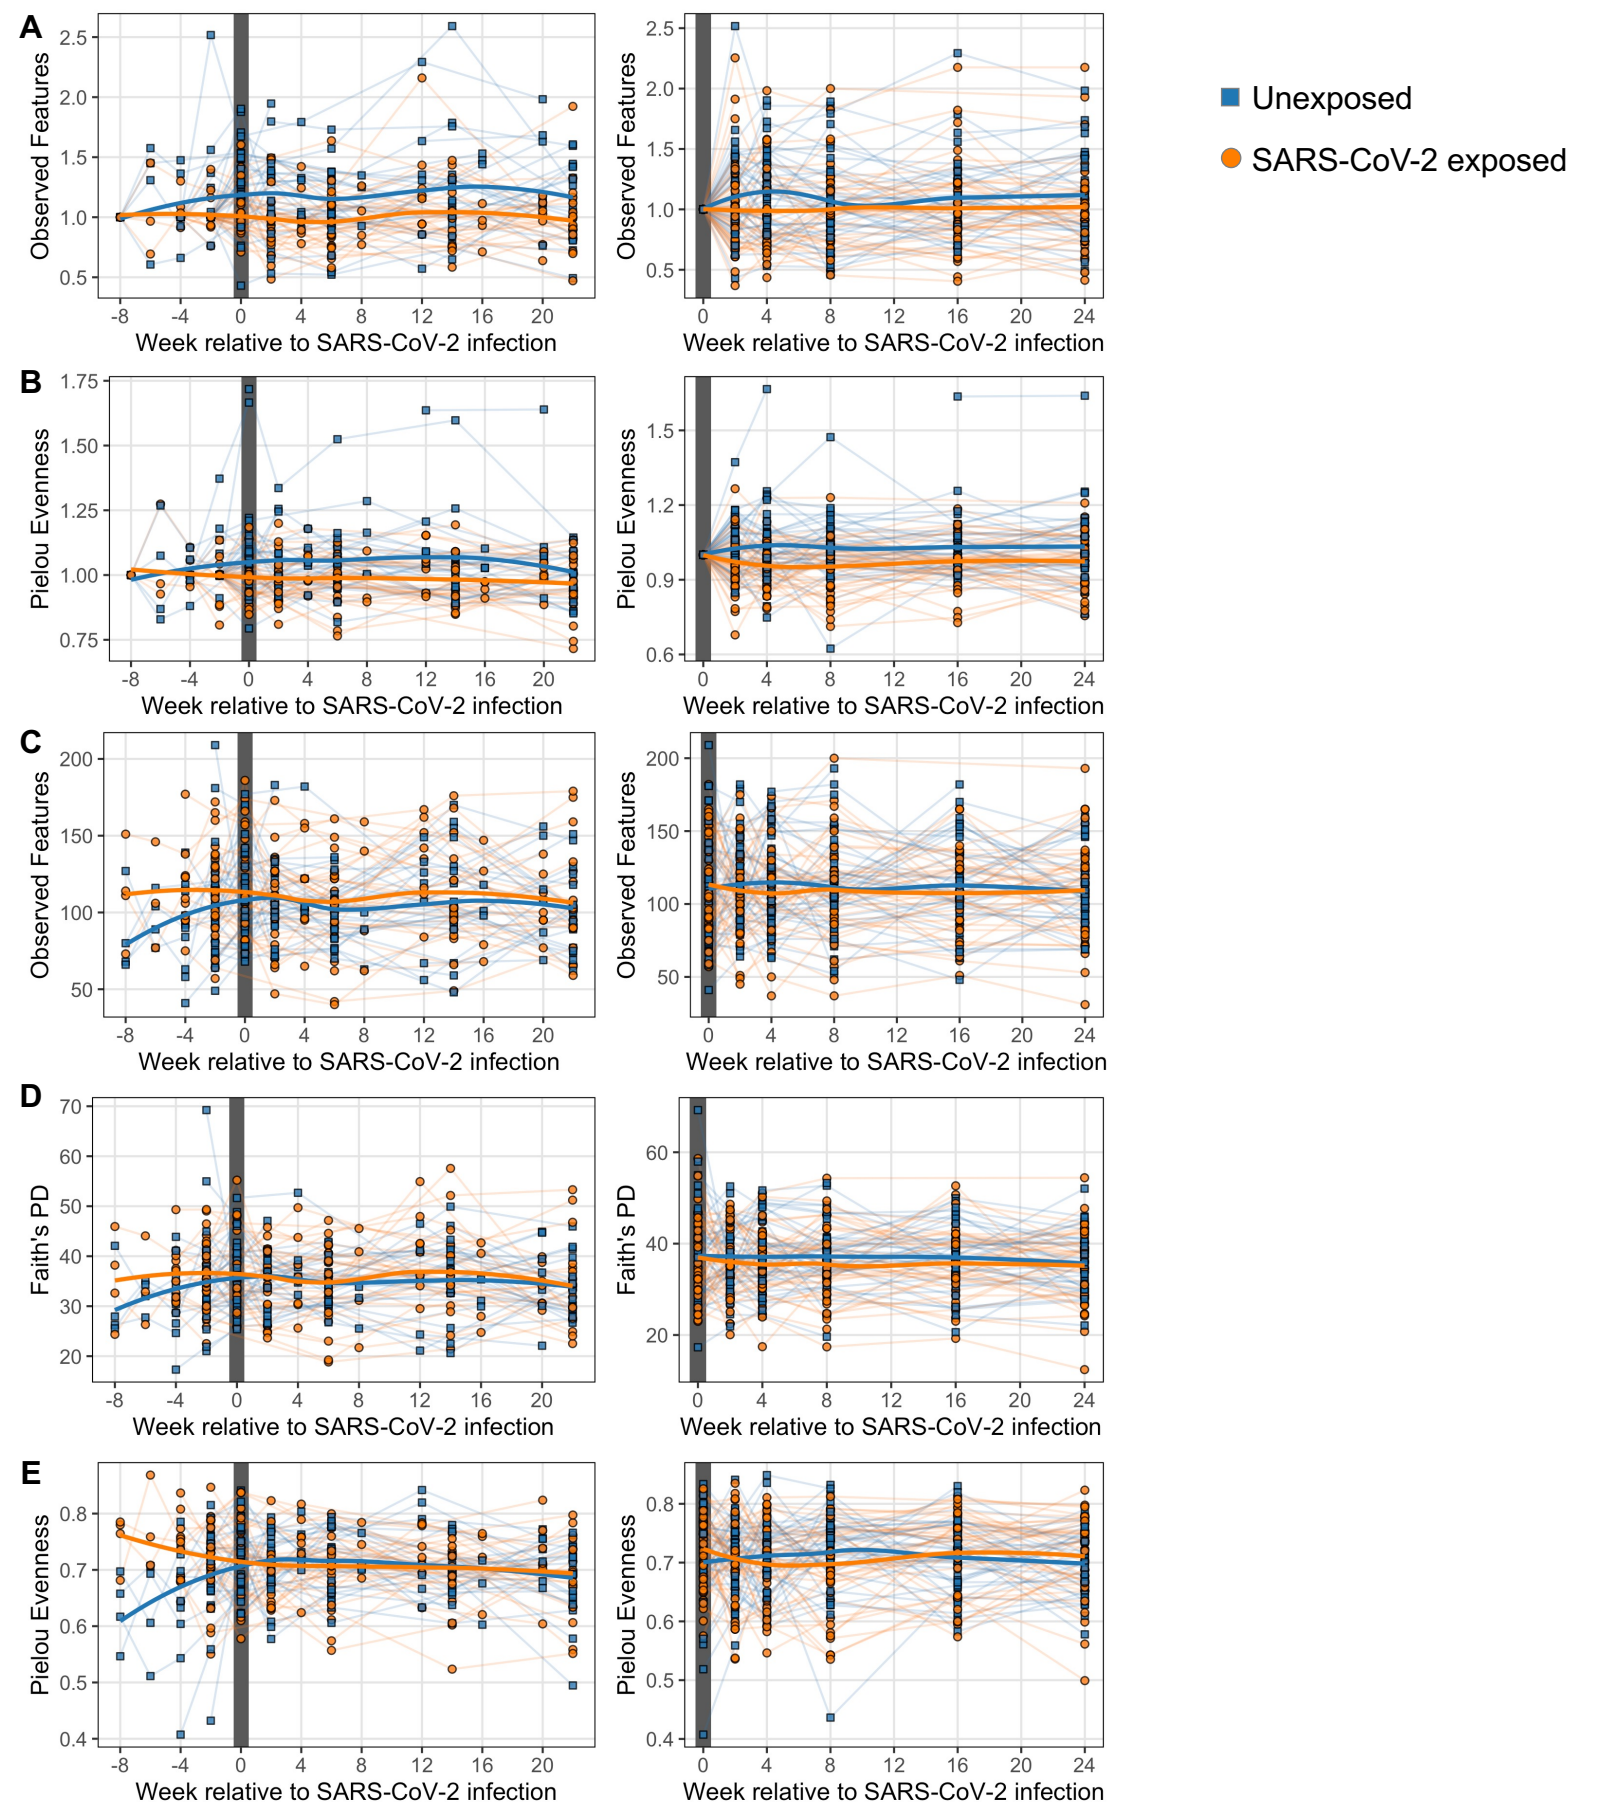

**Figure S2. Alpha diversity over time of the salivary microbiome.** Alpha diversity normalized based on proportion of the first timepoint for each individual reported as **A**. Observed features (ASVs) and **B**. Pielou Evenness values in proportion to the week zero sample and without normalization **C**. Observed features (ASVs) **D**. Faith's Phylogenetic Diversity (PD) and **E**. Pielou Evenness **Left Panels:** SARS-CoV-2 infected subjects ( $n=34$ ) before, during, and after viral positivity and their 31 matched controls, with the study week shown relative to COVID infection with the week of the first positive test defined as week 0. **Right panels:** SARS-CoV-2-infected subjects ( $n=47$ ) who were virus-positive at the first study visit and their 41 matched controls. There were no significant differences in either analysis between infected subjects and controls ( $p > 0.05$ ) when controlling for age and week of sampling, using linear mixed effects modeling.





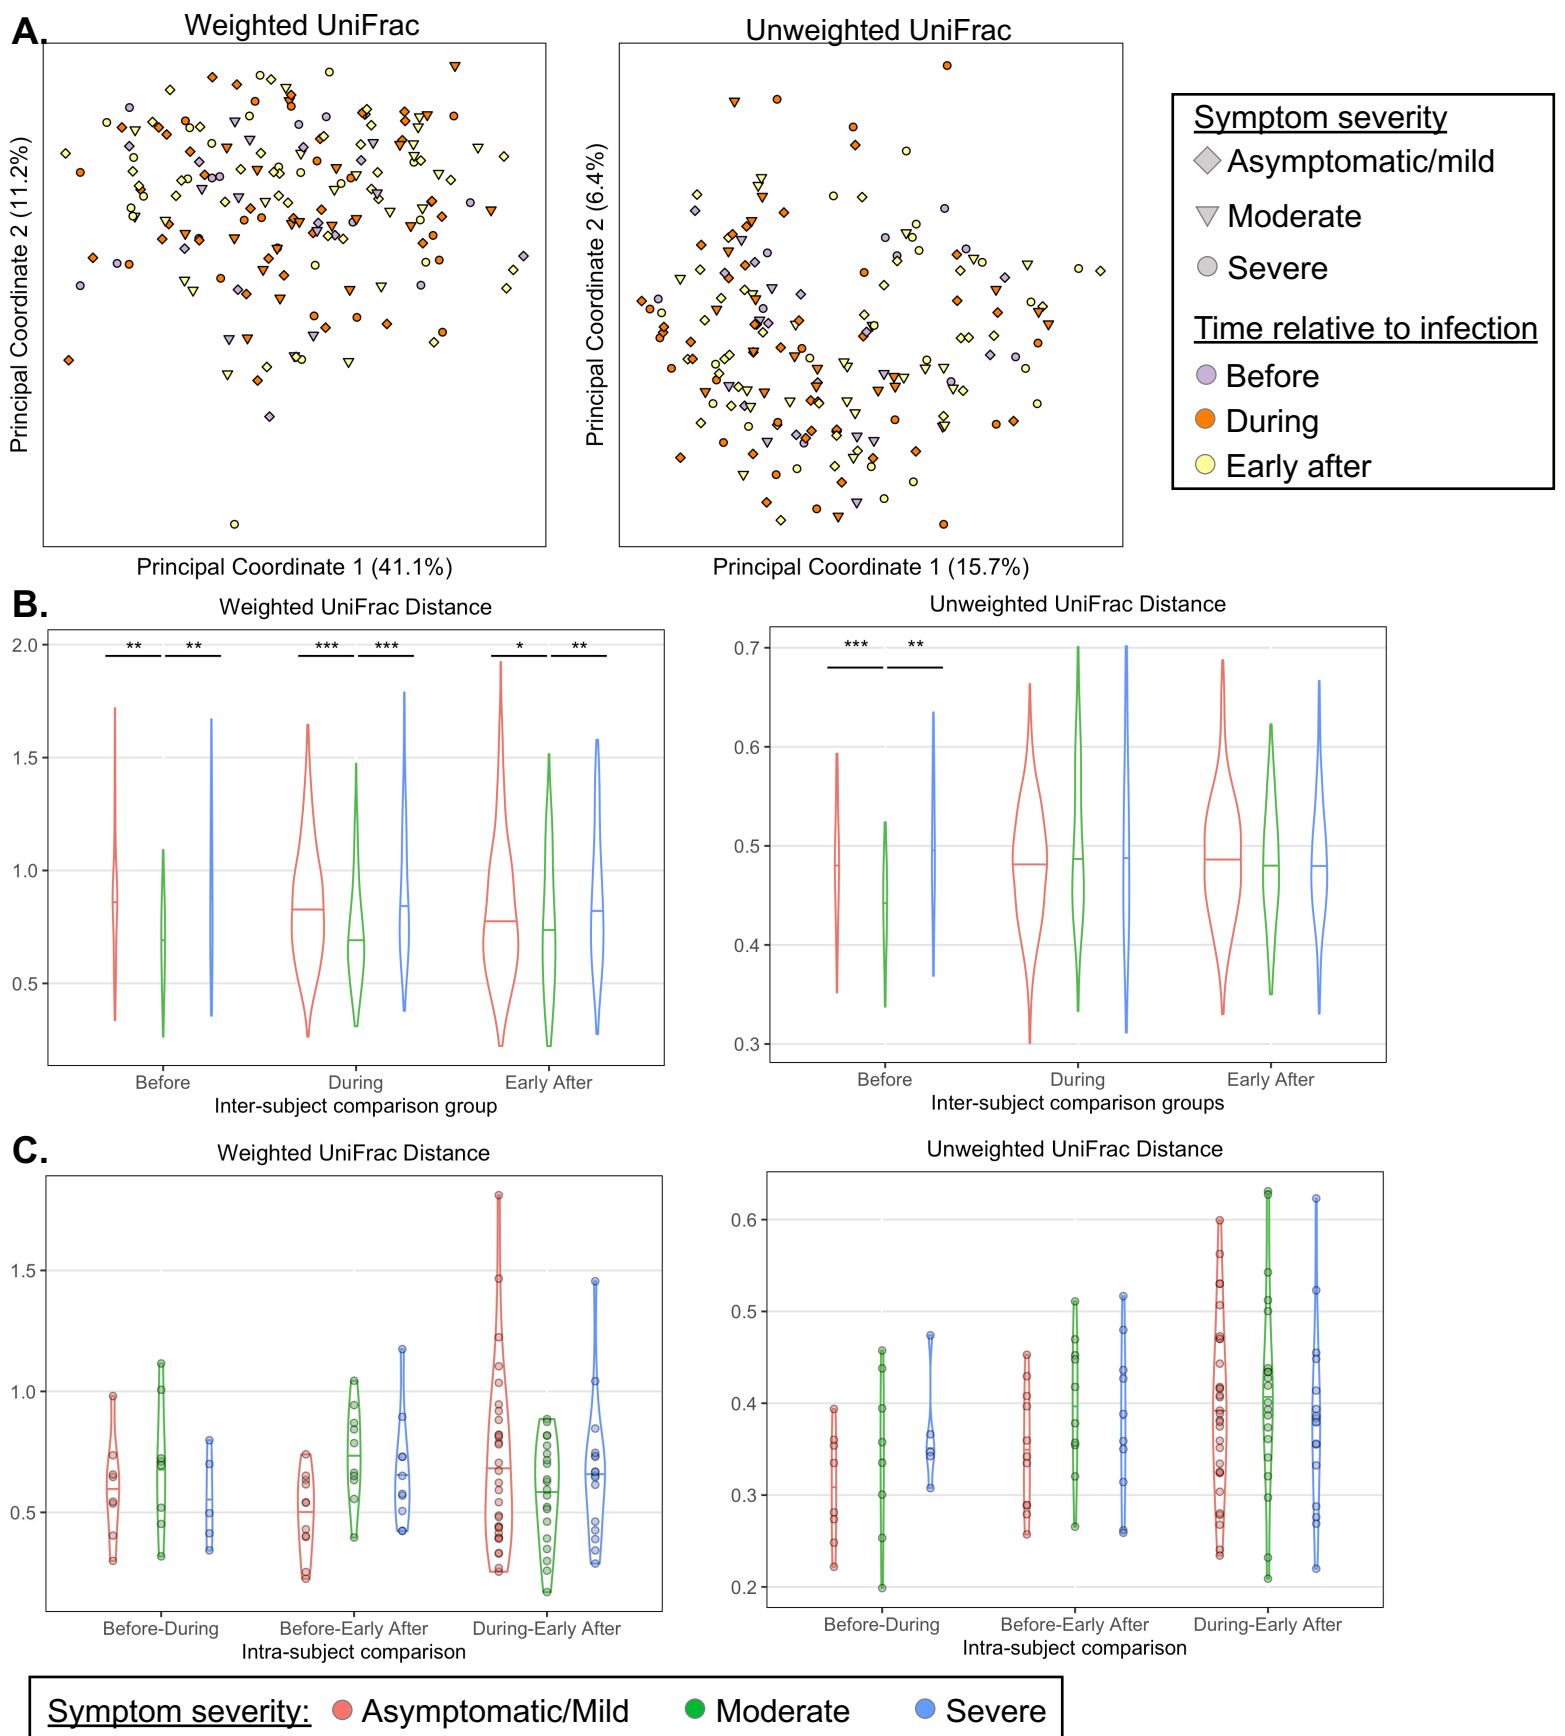

**Figure S4. Beta diversity of the salivary microbiome in 81 SARS-CoV-2 subjects before, during, and early after infection, according to symptom severity.** **A.** Weighted and unweighted UniFrac PCoA plots showing asymptomatic/mild subjects before (n=11), during (n=34), and early after (n=34) infection; moderate symptom subjects before (n=12), during (n=20), and early after (n=22) infection; and severe symptom subjects before (n=10), during (n=17), and early after (n=22) infection. **B.** Inter-subject weighted and unweighted UniFrac distances within symptom severity groups comparing within each severity group before, during, or early after infection. **C.** Intra-subject distances (distance between timepoints for individual subjects) broken up by the three severity groups. Kruskal-Wallis test with Dunn's post hoc test FDR-correct p-values: \*\*  $p < 0.01$ , \*\*\*  $p < 0.001$ .

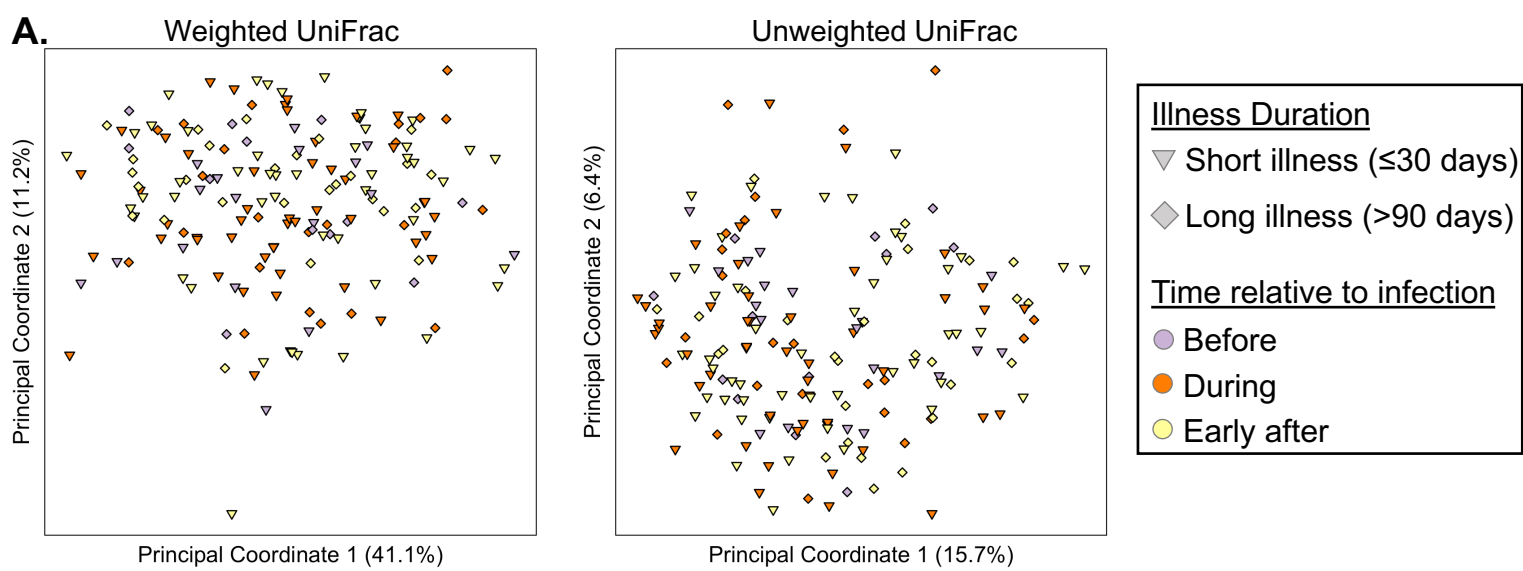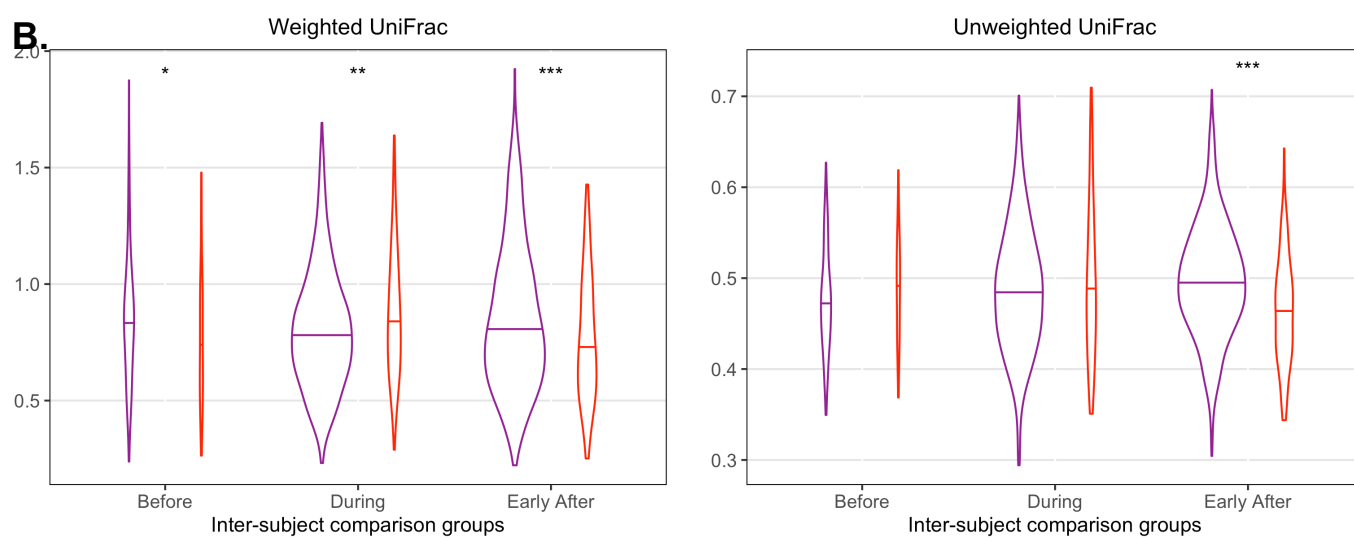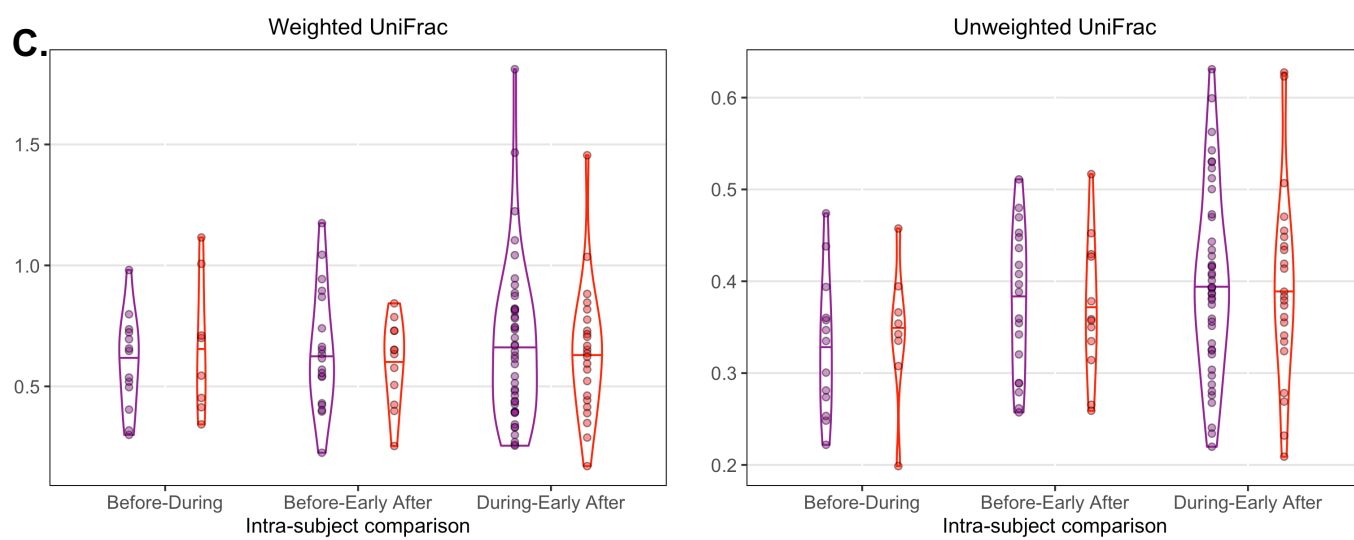

**Illness duration:** ● Short illness ( $\leq 30$  days) ● Long illness ( $> 90$  days)

**Figure S5. Beta diversity of SARS-CoV-2 cases by illness duration before, during, and early after infection. A.** Weighted and unweighted UniFrac PCoA plots showing subjects with short duration illness ( $\leq 30$  days) before ( $n=19$ ), during ( $n=48$ ), and early after ( $n=51$ ) infection; moderate symptom subjects before ( $n=14$ ), during ( $n=23$ ), and early after ( $n=27$ ) infection. **B.** Inter-subject weighted and unweighted UniFrac distances within all short or long illness duration cases comparing before, during, or early after infection. **C.** Intra-subject distances (distance between timepoints for individual subjects) broken up by illness duration. Mann-Whitney U test p-values: \*  $p < 0.05$ , \*\*  $p < 0.01$ , \*\*\*  $p < 0.001$

**A.**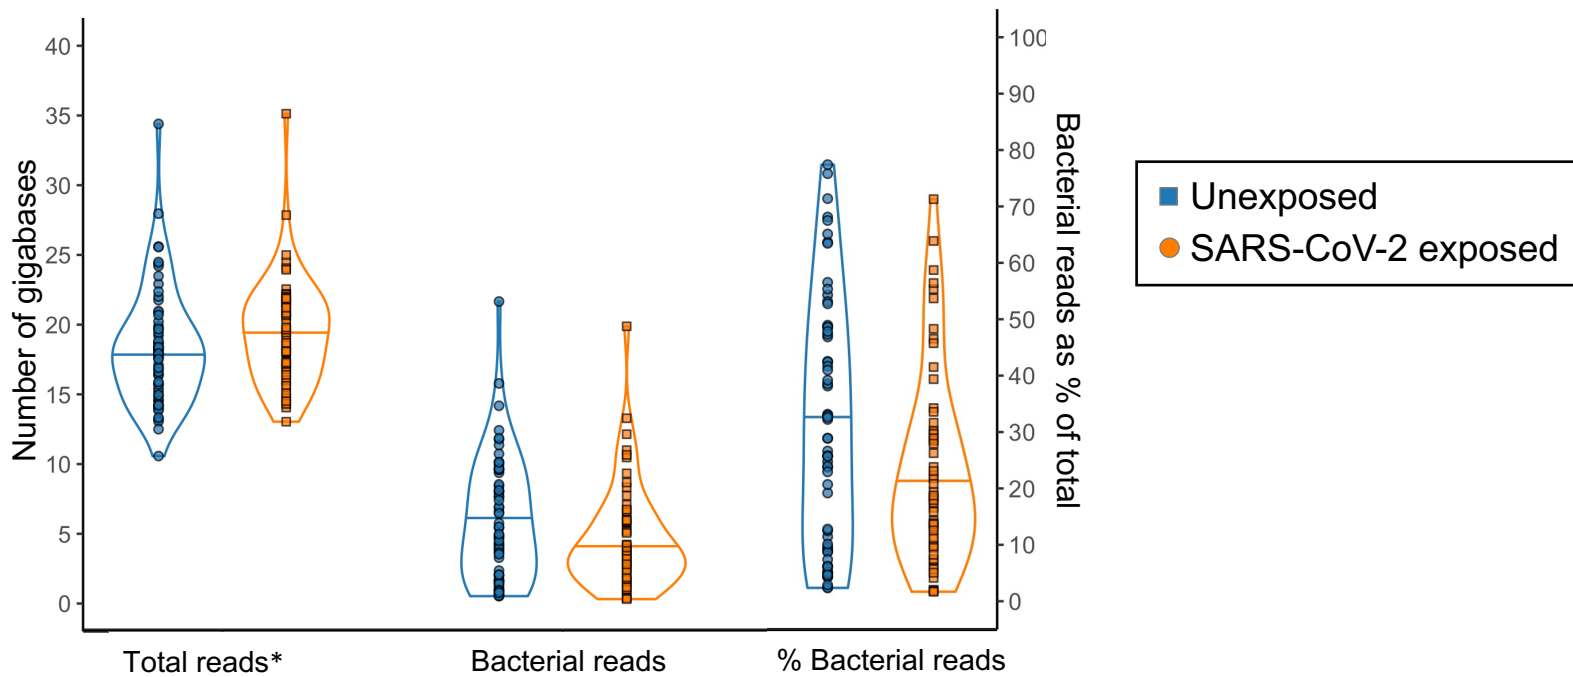**B.**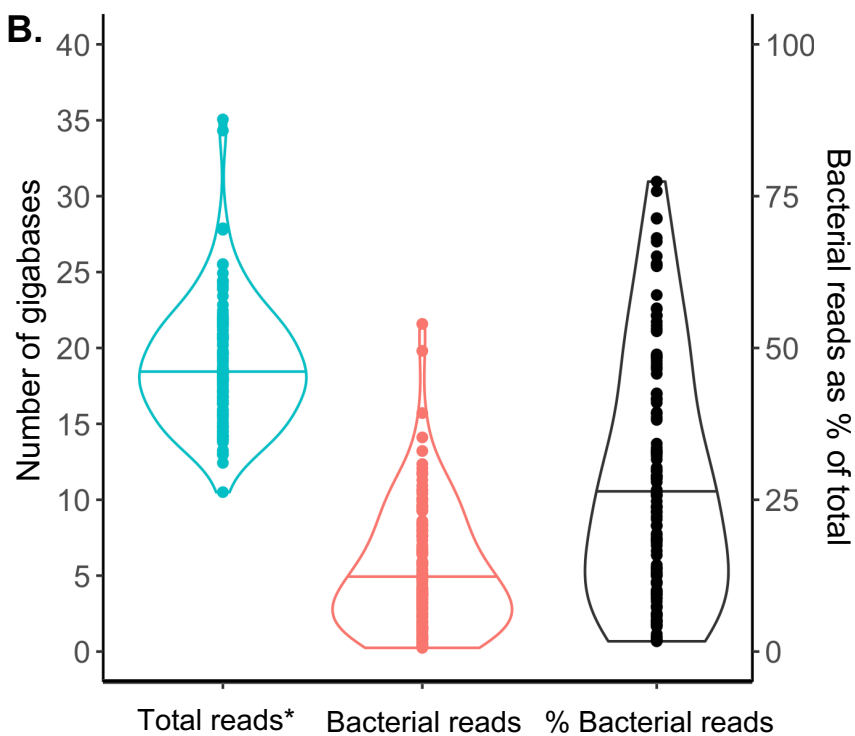

**Figure S6. Summary of shotgun metagenomics sequencing of 123 samples.** Summary of gigabases (GB) per sample with the total number of reads (Total reads), the reads mapping to known bacterial sequencings (Bacterial reads) and the percent of the total reads that map to bacteria (% Bacterial reads). Showing **A.** All samples and **B.** Samples broken up by SARS-CoV-2-infected cases (n=81; orange) and controls (n=57; blue). There are no significant differences between cases and controls ( $p > 0.05$ , Mann-Whitney U test). \*One outlier sample in the control group with total reads of 84 GB not visualized but included in statistics.



**Supplemental Material S1. Statistical comparison of comorbidities between exposed and unexposed groups**

```
univar age1 gfr bmi if _m == 3, by(any_positive_match)
```

```
-> any_positive_match=0
```

| Variable | n  | Mean   | S.D.  | Min   | .25   | Quantiles<br>Mdn | .75    | Max    |
|----------|----|--------|-------|-------|-------|------------------|--------|--------|
| age1     | 56 | 41.86  | 12.94 | 23.00 | 31.00 | 38.50            | 53.00  | 77.00  |
| gfr      | 56 | 104.80 | 18.76 | 52.64 | 92.53 | 107.33           | 116.26 | 143.75 |
| bmi      | 56 | 27.37  | 5.17  | 16.43 | 23.31 | 27.23            | 31.50  | 42.04  |

```
-> any_positive_match=1
```

| Variable | n  | Mean  | S.D.  | Min   | .25   | Quantiles<br>Mdn | .75    | Max    |
|----------|----|-------|-------|-------|-------|------------------|--------|--------|
| age1     | 82 | 41.09 | 12.84 | 23.00 | 31.00 | 36.00            | 51.00  | 76.00  |
| gfr      | 82 | 99.97 | 18.22 | 46.23 | 87.63 | 100.44           | 115.45 | 140.77 |
| bmi      | 82 | 27.49 | 6.87  | 6.14  | 23.29 | 27.63            | 31.66  | 43.77  |

Two-sample Wilcoxon rank-sum (Mann-Whitney) test

| any_positi~h | Obs | Rank sum | Expected |
|--------------|-----|----------|----------|
| 0            | 56  | 3997     | 3892     |
| 1            | 82  | 5594     | 5699     |
| Combined     | 138 | 9591     | 9591     |

Unadjusted variance 53190.67  
 Adjustment for ties -80.40  
 -----  
 Adjusted variance 53110.27

H0: age1(any\_po~h==0) = age1(any\_po~h==1)  
 z = 0.456  
 Prob > |z| = 0.6487  
 Exact prob = 0.6505

Two-sample Wilcoxon rank-sum (Mann-Whitney) test

| any_positi~h | Obs | Rank sum | Expected |
|--------------|-----|----------|----------|
| 0            | 56  | 4187     | 3892     |
| 1            | 82  | 5404     | 5699     |
| Combined     | 138 | 9591     | 9591     |

Unadjusted variance 53190.67  
 Adjustment for ties -5.22  
 -----  
 Adjusted variance 53185.44

H0: gfr(any\_po~h==0) = gfr(any\_po~h==1)  
 z = 1.279  
 Prob > |z| = 0.2008  
 Exact prob = 0.2019

Two-sample Wilcoxon rank-sum (Mann-Whitney) test

| any_positiv~h | Obs | Rank sum | Expected |
|---------------|-----|----------|----------|
| 0             | 56  | 3848     | 3892     |
| 1             | 82  | 5743     | 5699     |
| Combined      | 138 | 9591     | 9591     |

Unadjusted variance 53190.67  
 Adjustment for ties -2.31  
 -----  
 Adjusted variance 53188.36

H0: bmi(any\_positiv~h==0) = bmi(any\_positiv~h==1)  
 z = -0.191  
 Prob > |z| = 0.8487  
 Exact prob = 0.8500

. tab gender any\_positive\_match if \_m == 3, col exact

```

+-----+
| Key          |
+-----+
| frequency    |
| column percentage |
+-----+

```

| Gender | any_positive |              | Total         |
|--------|--------------|--------------|---------------|
|        | 0            | 1            |               |
| Female | 40<br>71.43  | 61<br>74.39  | 101<br>73.19  |
| Male   | 16<br>28.57  | 21<br>25.61  | 37<br>26.81   |
| Total  | 56<br>100.00 | 82<br>100.00 | 138<br>100.00 |

Fisher's exact = 0.701  
 1-sided Fisher's exact = 0.423

. tab race\_eth any\_positive\_match if \_m == 3, col exact

```

+-----+
| Key          |
+-----+
| frequency    |
| column percentage |
+-----+

```

Enumerating sample-space combinations:

stage 5: enumerations = 1  
 stage 4: enumerations = 3  
 stage 3: enumerations = 7  
 stage 2: enumerations = 14  
 stage 1: enumerations = 0

| Race and<br>hispanic<br>ethnicity | any_positive |             | Total       |
|-----------------------------------|--------------|-------------|-------------|
|                                   | 0            | 1           |             |
| 1                                 | 22<br>40.00  | 36<br>44.44 | 58<br>42.65 |

|       |        |        |        |
|-------|--------|--------|--------|
| 2     | 8      | 10     | 18     |
|       | 14.55  | 12.35  | 13.24  |
| 3     | 9      | 13     | 22     |
|       | 16.36  | 16.05  | 16.18  |
| 4     | 11     | 17     | 28     |
|       | 20.00  | 20.99  | 20.59  |
| 5     | 5      | 5      | 10     |
|       | 9.09   | 6.17   | 7.35   |
| Total | 55     | 81     | 136    |
|       | 100.00 | 100.00 | 100.00 |

Fisher's exact = 0.951

. tab hc\_role\_alt any\_positive\_match if \_m == 3, col exact

| RECODE of hc_role | any_positive |        | Total  |
|-------------------|--------------|--------|--------|
|                   | 0            | 1      |        |
| 0                 | 8            | 10     | 18     |
|                   | 14.29        | 12.20  | 13.04  |
| 1                 | 48           | 72     | 120    |
|                   | 85.71        | 87.80  | 86.96  |
| Total             | 56           | 82     | 138    |
|                   | 100.00       | 100.00 | 100.00 |

Fisher's exact = 0.799

1-sided Fisher's exact = 0.455

. tab hc\_role any\_positive\_match if \_m == 3, col exact

| Key | frequency | column percentage |
|-----|-----------|-------------------|
| 0   | 8         | 14.29             |
| 1   | 10        | 12.20             |

Enumerating sample-space combinations:

stage 5: enumerations = 1  
stage 4: enumerations = 5  
stage 3: enumerations = 13  
stage 2: enumerations = 59  
stage 1: enumerations = 0

| hc_role               | any_positive |       | Total |
|-----------------------|--------------|-------|-------|
|                       | 0            | 1     |       |
| Non-healthcare worker | 8            | 10    | 18    |
|                       | 14.29        | 12.20 | 13.04 |



|                       |        |        |        |
|-----------------------|--------|--------|--------|
| Attending physician   | 8      | 7      | 15     |
|                       | 14.29  | 8.54   | 10.87  |
| Resident or fellow ph | 7      | 8      | 15     |
|                       | 12.50  | 9.76   | 10.87  |
| Nurse                 | 22     | 42     | 64     |
|                       | 39.29  | 51.22  | 46.38  |
| Other                 | 11     | 15     | 26     |
|                       | 19.64  | 18.29  | 18.84  |
| Total                 | 56     | 82     | 138    |
|                       | 100.00 | 100.00 | 100.00 |

Fisher's exact = 0.644

. tab dm any\_positive\_match if \_m == 3, col exact

```

+-----+
| Key |
+-----+
| frequency |
| column percentage |
+-----+

```

| Patient has       | any_positive |        | Total  |
|-------------------|--------------|--------|--------|
| Diabetes Mellitus | 0            | 1      |        |
| No                | 50           | 80     | 130    |
|                   | 90.91        | 97.56  | 94.89  |
| Yes               | 5            | 2      | 7      |
|                   | 9.09         | 2.44   | 5.11   |
| Total             | 55           | 82     | 137    |
|                   | 100.00       | 100.00 | 100.00 |

Fisher's exact = 0.117

1-sided Fisher's exact = 0.092

. tab cvd any\_positive\_match if \_m == 3, col exact

```

+-----+
| Key |
+-----+
| frequency |
| column percentage |
+-----+

```

| cvd   | any_positive |        | Total  |
|-------|--------------|--------|--------|
|       | 0            | 1      |        |
| No    | 54           | 77     | 131    |
|       | 98.18        | 97.47  | 97.76  |
| Yes   | 1            | 2      | 3      |
|       | 1.82         | 2.53   | 2.24   |
| Total | 55           | 79     | 134    |
|       | 100.00       | 100.00 | 100.00 |

```

Fisher's exact = 1.000
1-sided Fisher's exact = 0.634

```

```

. tab bmi_cat any_positive_match if _m == 3, col exact

```

```

+-----+
| Key |
+-----+
| frequency |
| column percentage |
+-----+

```

Enumerating sample-space combinations:

```

stage 4: enumerations = 1
stage 3: enumerations = 1
stage 2: enumerations = 2
stage 1: enumerations = 0

```

| bmi_cat       | any_positive |              | Total         |
|---------------|--------------|--------------|---------------|
|               | 0            | 1            |               |
| BMI <18.5     | 1<br>1.79    | 3<br>3.66    | 4<br>2.90     |
| BMI 18.5-24.9 | 18<br>32.14  | 27<br>32.93  | 45<br>32.61   |
| BMI 25-29.9   | 18<br>32.14  | 25<br>30.49  | 43<br>31.16   |
| BMI ≥30       | 19<br>33.93  | 27<br>32.93  | 46<br>33.33   |
| Total         | 56<br>100.00 | 82<br>100.00 | 138<br>100.00 |

```

Fisher's exact = 0.974

```
